# Supplementary material
Source: PubMed Central journal article supplement (PMC6589060)
Supplement: IAI.00904-18-s0001.pdf [file IAI.00904-18-s0001.pdf]

## **Non-helical *Helicobacter pylori* show altered gland colonization and elicit less gastric pathology during chronic infection**

Laura E. Martínez<sup>1,2</sup>, Valerie P. O'Brien<sup>2</sup>, Christina K. Leverich<sup>2</sup>, Sue E. Knoblauch<sup>3</sup>, Nina R. Salama<sup>1,2\*</sup>

<sup>1</sup>Graduate Program in Pathobiology, Department of Global Health, University of Washington, Seattle, WA, 98195, USA.

<sup>2</sup>Division of Human Biology, Fred Hutchinson Cancer Research Center, Seattle, WA, 98109, USA.

<sup>3</sup>Department of Veterinary Biosciences, The Ohio State University, Columbus, OH, 43210, USA.

\*Correspondence to: [nsalama@fredhutch.org](mailto:nsalama@fredhutch.org)

### **Supplementary Information:**

**Table S1.** Primers used in this study.

**Table S2.** Histopathologic scoring for inflammation and hyperplasia in mice chronically infected with *H. pylori* for one and three months.

#### **References**

**Figure S1.** Complementation of *csd6* restores helical cell shape.

**Figure S2.** 3D-visualization of *H. pylori* and bacterial quantitation by volumetric image analysis.

**Figure S3.** Visualization of bacteria within gastric glands.

**Figure S4.** The  $\Delta csd6$  mutant results in decreased inflammation and hyperplasia scores at one and three months of infection.

**Figure S5.** The  $\Delta csd6$  mutant and *csd6* complemented strains elicit IL-8 secretion by human gastric epithelial cells.

**Table S1.** Primers used in this study.

| Gene name                                     | <i>H. pylori</i> gene annotation                                   | Primer                 | Sequence                                    |
|-----------------------------------------------|--------------------------------------------------------------------|------------------------|---------------------------------------------|
| <i>Targeted disruption primers</i>            |                                                                    |                        |                                             |
| <i>csd6</i>                                   | HPG27_477 <sup>a</sup><br>(HP0518) <sup>b</sup>                    | HPG27_476<br>Forward   | gcgcgctctagAAGGAAGAAAAGAGCTTGC <sup>c</sup> |
|                                               |                                                                    | HPG27_478<br>Reverse   | GCTGGTAGGCTTTGTAATC                         |
| <i>Complementation primers</i>                |                                                                    |                        |                                             |
| <i>csd6</i> at<br>McGee<br>locus <sup>d</sup> | $\Delta csd6::cat$<br><i>McGee:csd6</i><br>: <i>aphA3</i> in PMSS1 | McGee locus<br>Forward | GAGCGAGAATTCAAAGACAACCCCA                   |
|                                               |                                                                    | McGee locus<br>Reverse | GGCGATGGGGCTGGGGCGTGCGTGATAGGC              |

<sup>a</sup>Gene annotation in the human clinical isolate G27 (1).

<sup>b</sup>Gene annotation in the human clinical isolate 26695 (2).

<sup>c</sup>Gene specific sequences are in uppercase and sequences added for cloning are in lower case.

<sup>d</sup>McGee Locus: The intergenic sequence (204322 – 204784) is located between genes HPG27\_186 (204127 – 204321) and HPG27\_187 (204785 – 205168) in the *H. pylori* strain G27 (1).

**Table S2.** Histopathologic scoring for inflammation and hyperplasia in mice chronically infected with *H. pylori* for one and three months.

| <b>Score</b> | <b>Inflammation</b>                                  | <b>Hyperplasia</b>                                          | <b>Epithelial defects</b>              | <b>Oxyntic atrophy</b>                                | <b>Metaplasia</b>                                        |
|--------------|------------------------------------------------------|-------------------------------------------------------------|----------------------------------------|-------------------------------------------------------|----------------------------------------------------------|
| <b>0</b>     | No inflammation                                      | No hyperplasia                                              | No epithelial defects                  | No oxyntic atrophy                                    | No metaplasia                                            |
| <b>1</b>     | Mild patchy or multifocal islands                    | Mild elongation of mucosa                                   | Tattered epithelial surface            | Decreased chief cells; parietal cells intact          | < 50% replacement of oxyntic mucosa by antralized glands |
| <b>2</b>     | Moderate coalescing infiltrate                       | Increased surface epithelium 2X normal length               | Attenuated epithelial surface          | Few or no chief cells; parietal cells intact          | >50% replacement of oxyntic mucosa by antralized glands  |
| <b>3</b>     | Moderate to severe sheets in mucosa and/or submucosa | Increased surface epithelium 3X normal length               | Inapparent surface epithelium          | No remaining chief cells; loss of parietal cells      | Near complete replacement of glands by antralized mucosa |
| <b>4</b>     | Severe florid inflammation into muscularis           | Increased surface epithelium 4X normal length +/- dysplasia | Mucosal erosions of surface epithelium | No chief cells and few or no parietal cells remaining | Total replacement of glands by antralized mucosa         |

## References

1. Baltrus DA, Amieva MR, Covacci A, Lowe TM, Merrell DS, Ottemann KM, Stein M, Salama NR, Guillemin K. 2009. The complete genome sequence of *Helicobacter pylori* strain G27. *J Bacteriol* 191:447-8.
2. Tomb JF, White O, Kerlavage AR, Clayton RA, Sutton GG, Fleischmann RD, Ketchum KA, Klenk HP, Gill S, Dougherty BA, Nelson K, Quackenbush J, Zhou L, Kirkness EF, Peterson S, Loftus B, Richardson D, Dodson R, Khalak HG, Glodek A, McKenney K, Fitzgerald LM, Lee N, Adams MD, Hickey EK, Berg DE, Gocayne JD, Utterback TR, Peterson JD, Kelley JM, Cotton MD, Weidman JM, Fujii C, Bowman C, Watthey L, Wallin E, Hayes WS, Borodovsky M, Karp PD, Smith HO, Fraser CM, Venter JC. 1997. The complete genome sequence of the gastric pathogen *Helicobacter pylori*. *Nature* 388:539-47.

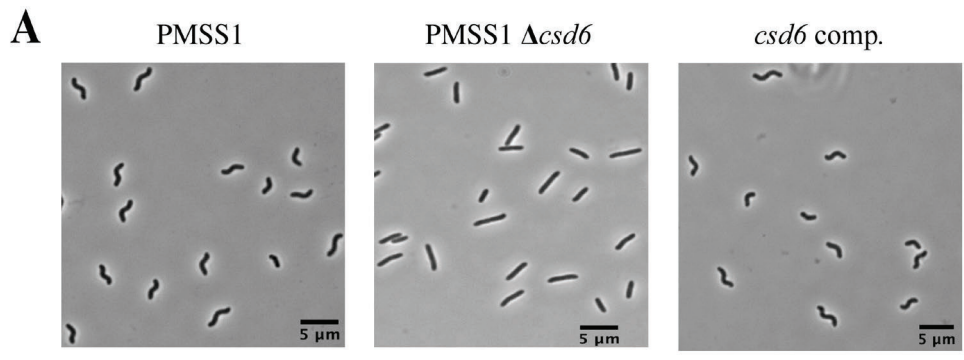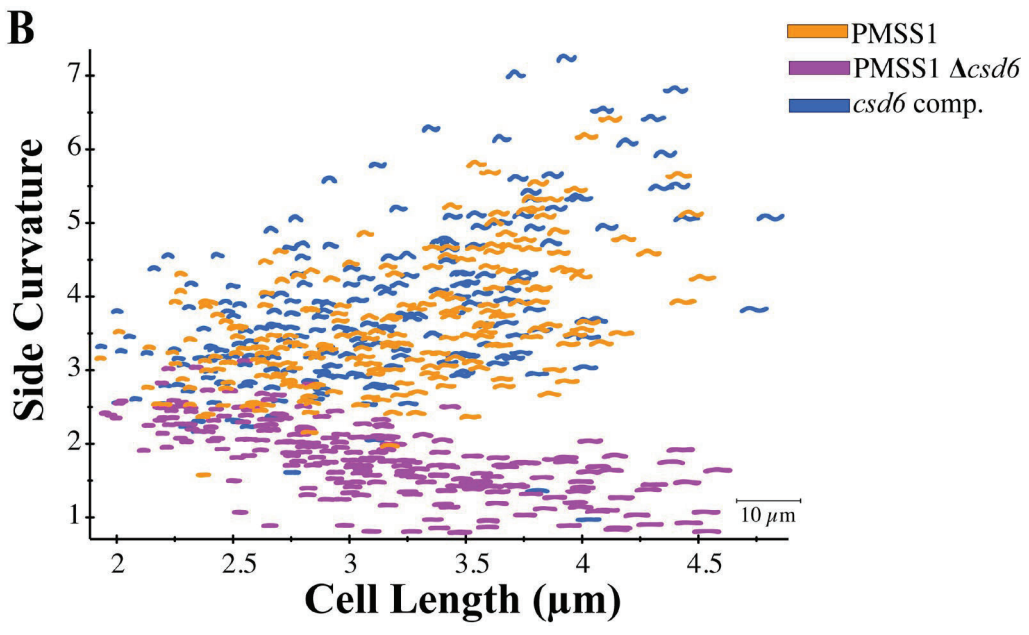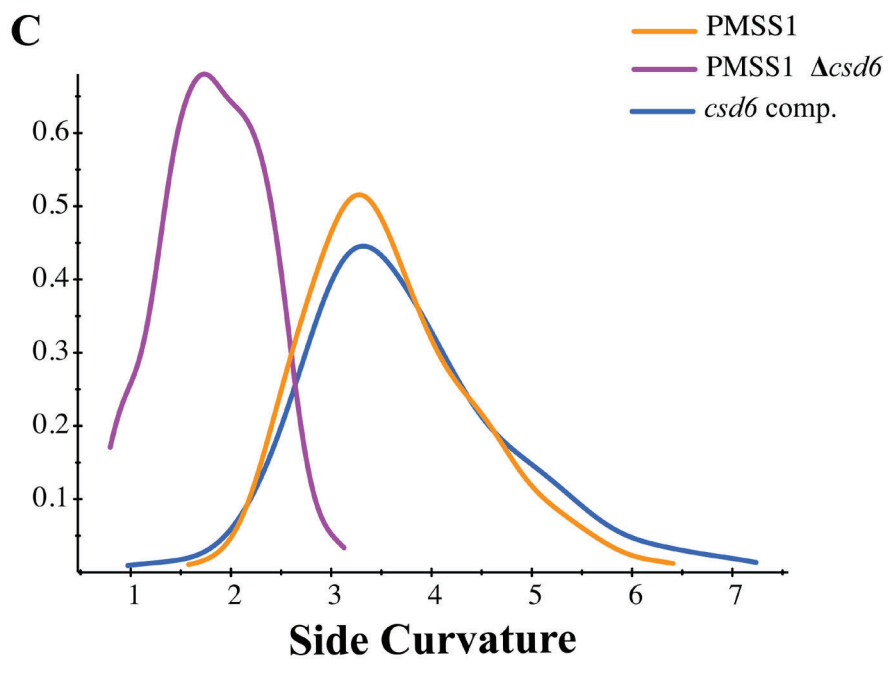

**Figure S1. Complementation of *csd6* restores helical cell shape.** (A) Representative phase contrast images of wild-type PMSS1 bacteria, straight rod ( $\Delta csd6$ ), and *csd6* complemented bacteria. Images were acquired at 100 X (oil immersion objective). Scale bar = 5  $\mu\text{m}$ . (B) Side curvature vs. cell length ( $\mu\text{m}$ ) for individual bacterial cells imaged using phase contrast microscopy of wild-type PMSS1 (orange, n=218),  $\Delta csd6$  (magenta, n=230), and the *csd6* complemented strain (blue, n=212). (C) Smooth histograms summarizing the side curvature distributions acquired for each strain shown in B. No significant difference in side curvature distributions were observed between wild-type and the *csd6* complemented strain ( $p = 0.64078$ ) using Kolmogorov-Smirnov statistics of side curvature distributions. Significant differences in side curvature distributions were observed between wild-type and  $\Delta csd6$ , and between  $\Delta csd6$  and the *csd6* complemented strain, where  $p < 0.00001$ . Data are from two independent experiments.

**A.**

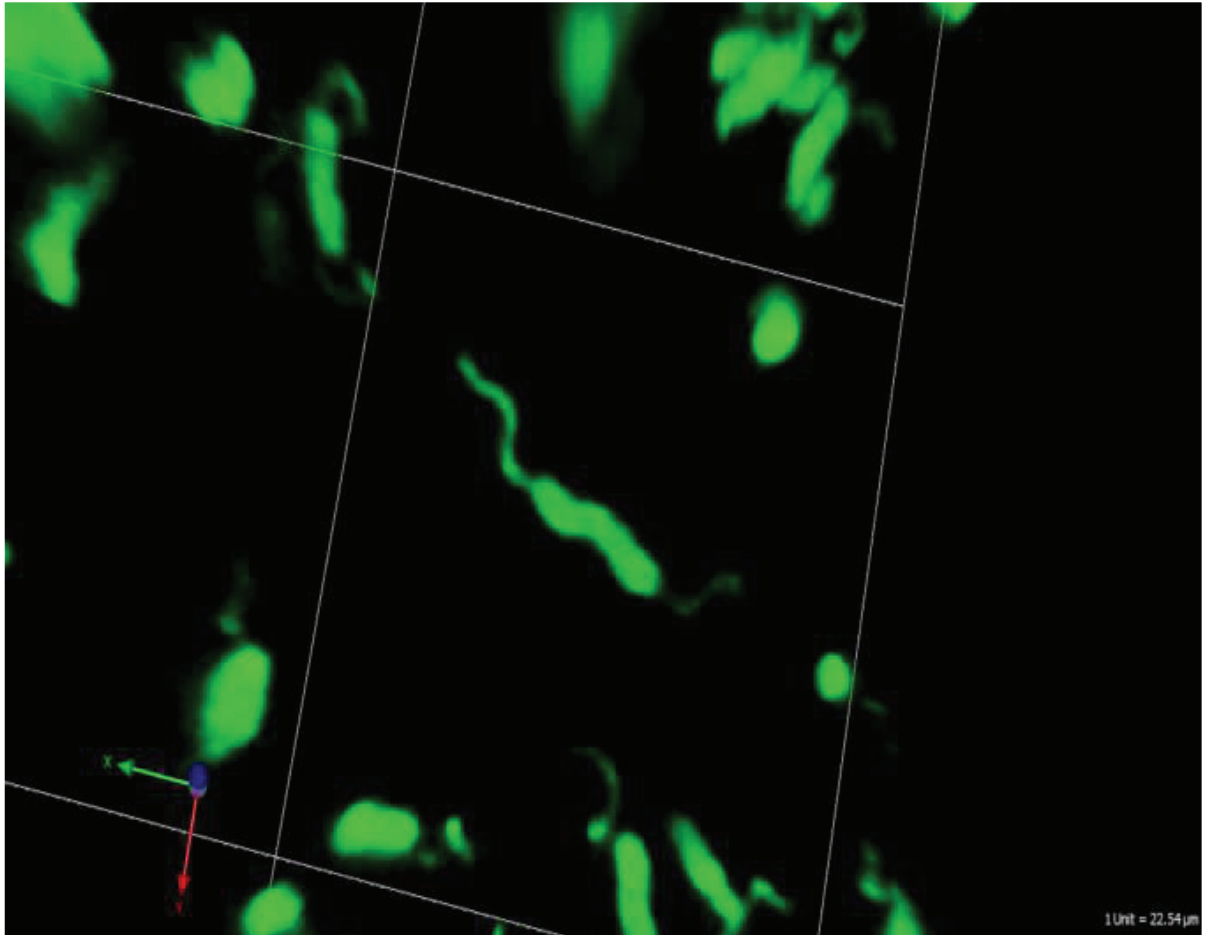

**B.**

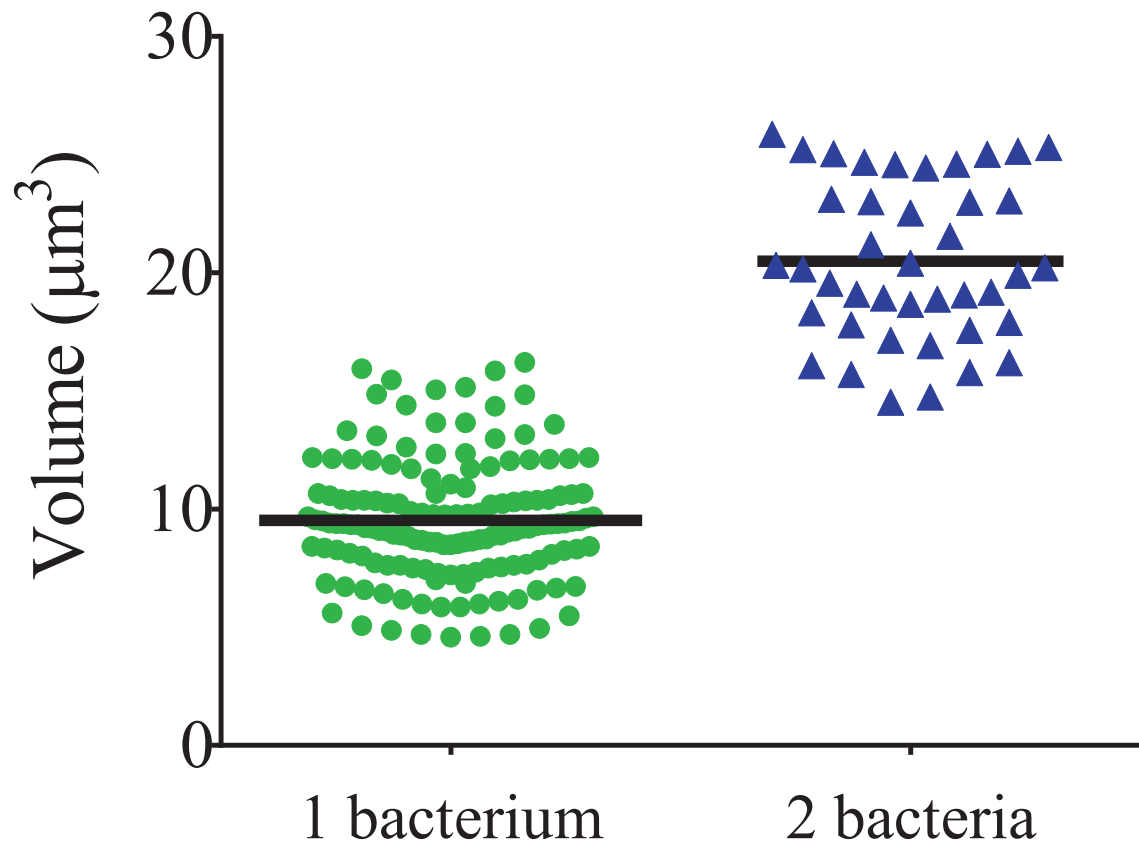

**Figure S2. 3D-visualization of *H. pylori* and bacterial quantitation by volumetric image analysis.** (A) Representative 3D image of wild-type PMSS1 bacteria (green), which was fixed in 2% PFA, embedded in 4% agarose, and sectioned to generate 200  $\mu\text{m}$  thick sections. 3D-images were generated from Z-stacks collected at 63 X (oil-immersion objective) with a Zeiss LSM 780 confocal microscope. (B) Volumetric image analysis of bacterial cells fixed in 2% PFA (n= 203). Bars indicate the mean. Data are from two independent experiments.



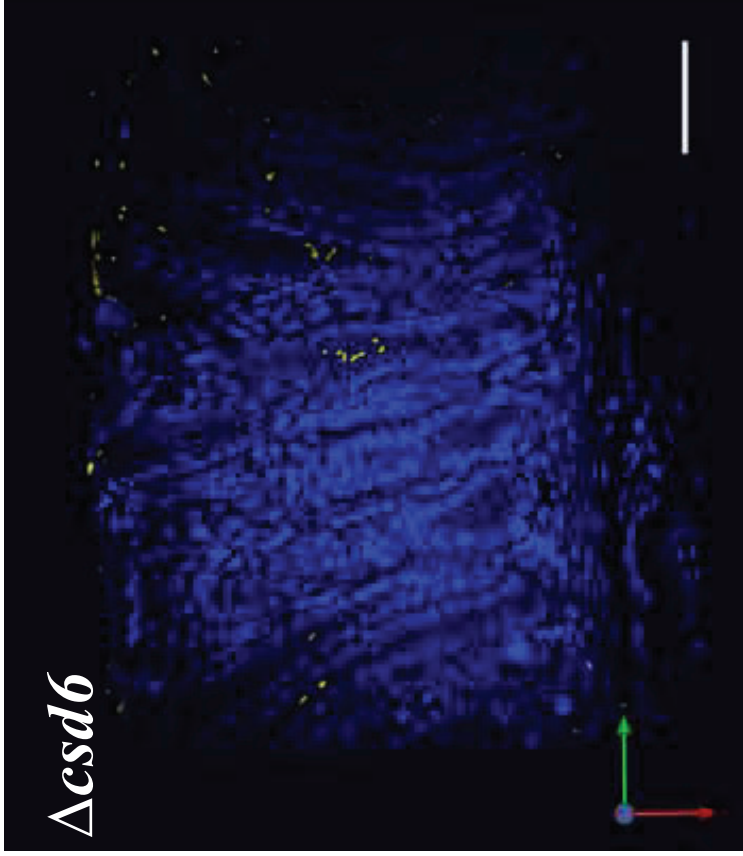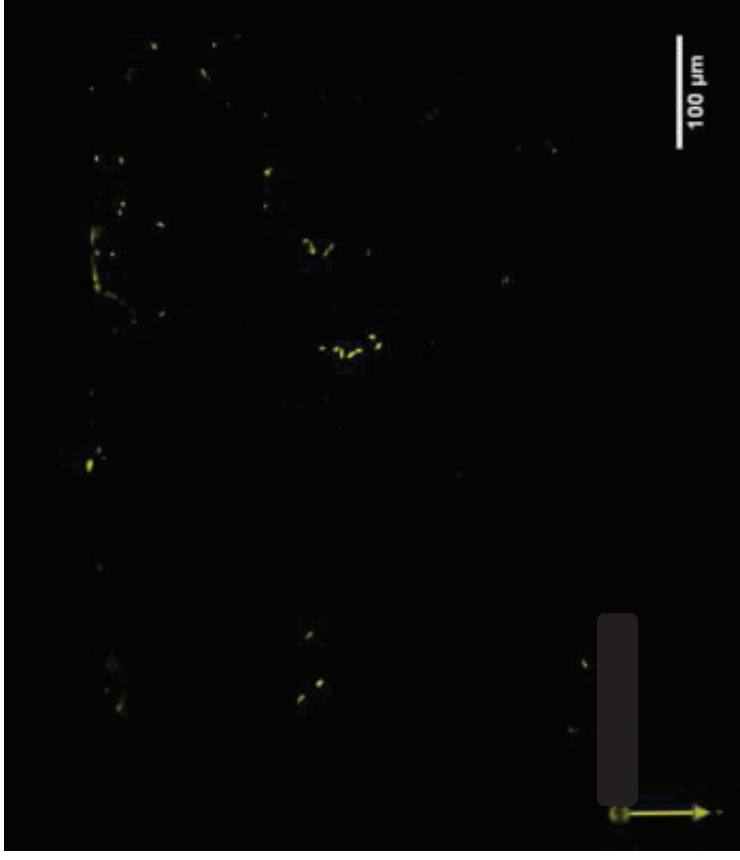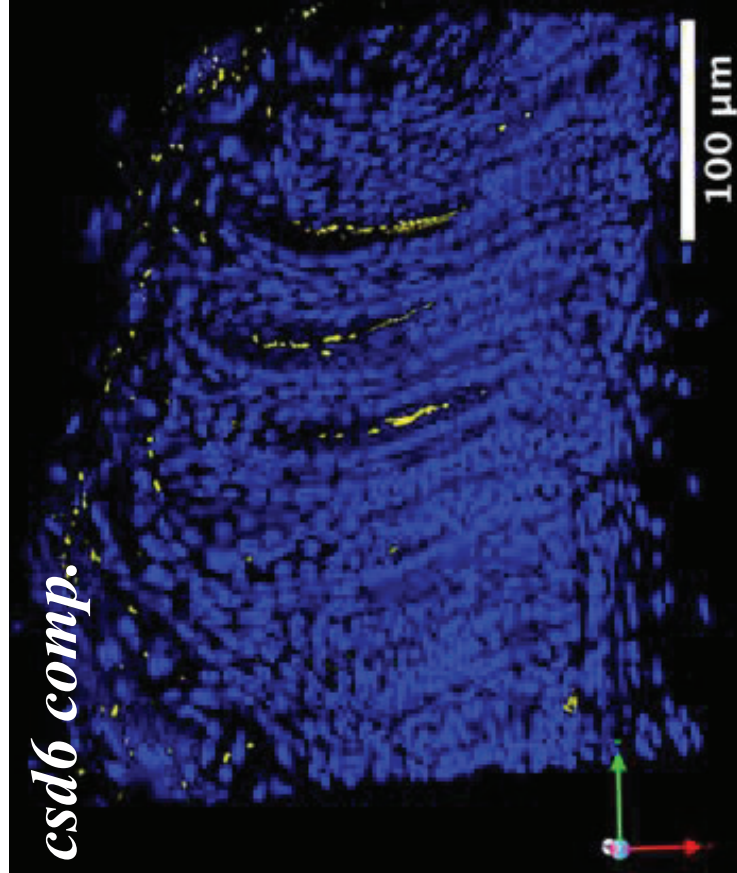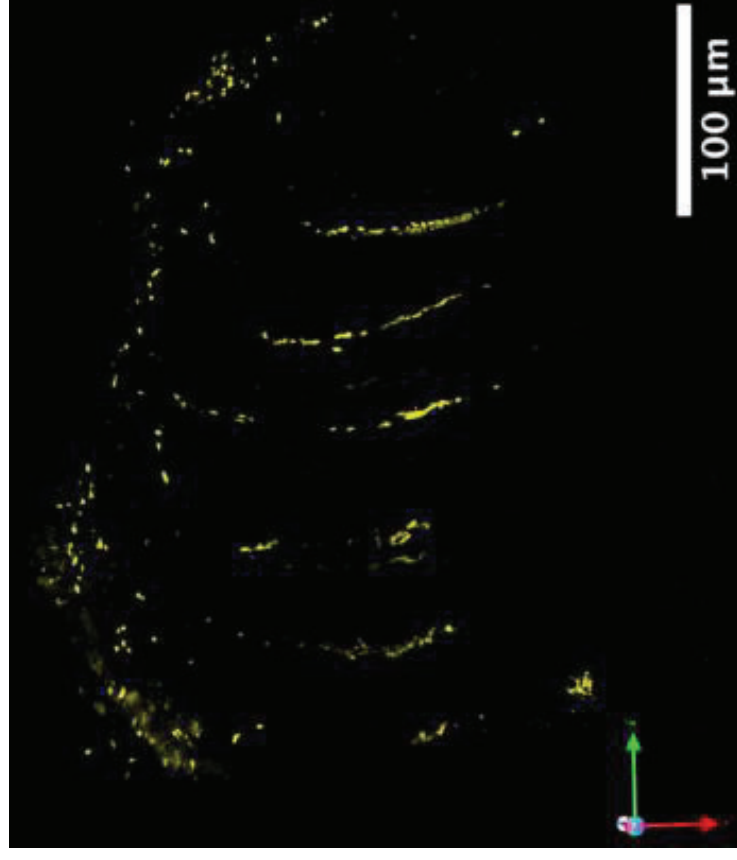

**Figure S3. Visualization of bacteria within gastric glands.** Thick stomach sections from the one week infections shown in **Figure 2A** were stained for *H. pylori*. Shown are representative images of the antrum of a mouse infected with  $\Delta csd6$  (**A**) or *csd6* complemented (**B**) bacteria. Images are maximum intensity projections of Z-stacks, with blue (DAPI, left panel) staining nuclei and yellow staining *H. pylori*. Scale bars = 100  $\mu\text{m}$ . Volumetric analysis for the mouse in **A** is found in **Figure 3C** and **B** is in **Figure 3D**.

**A.**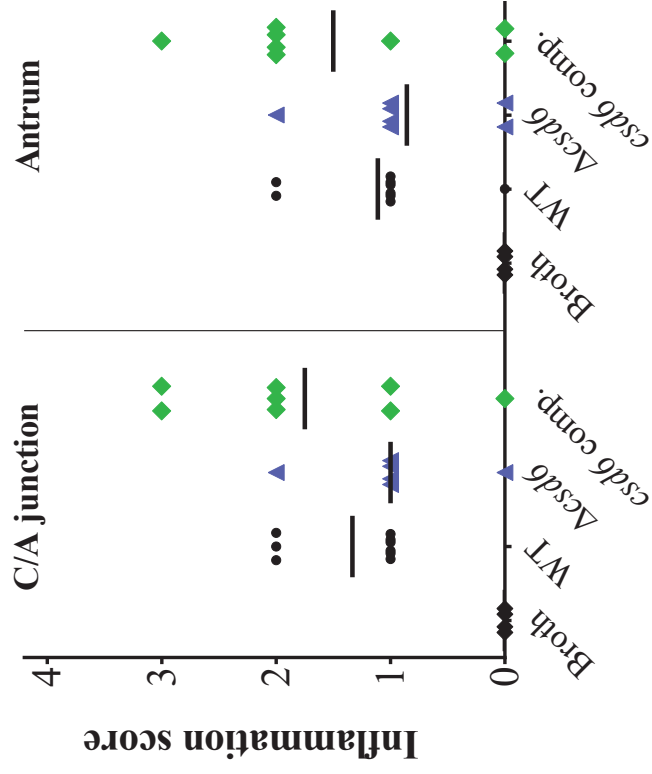**B.**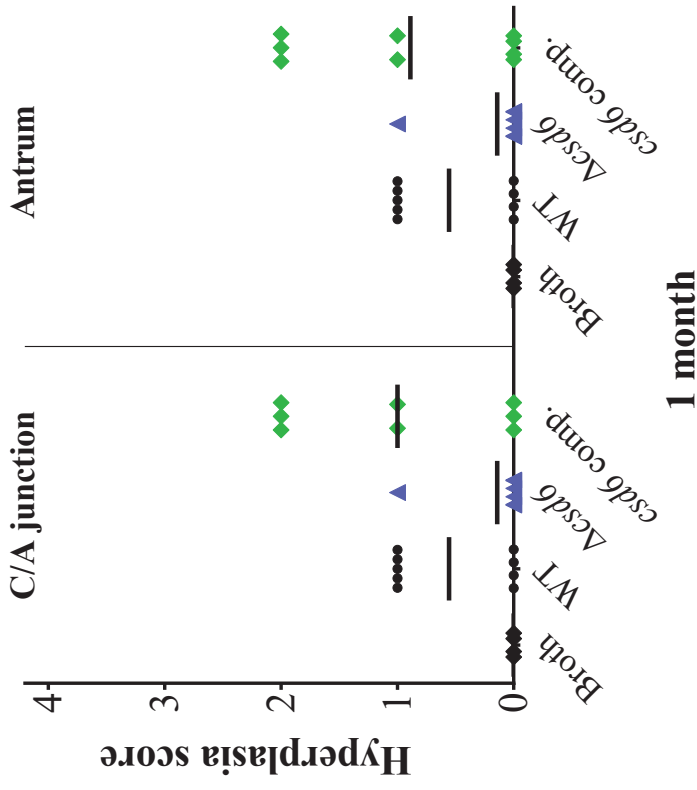**C.**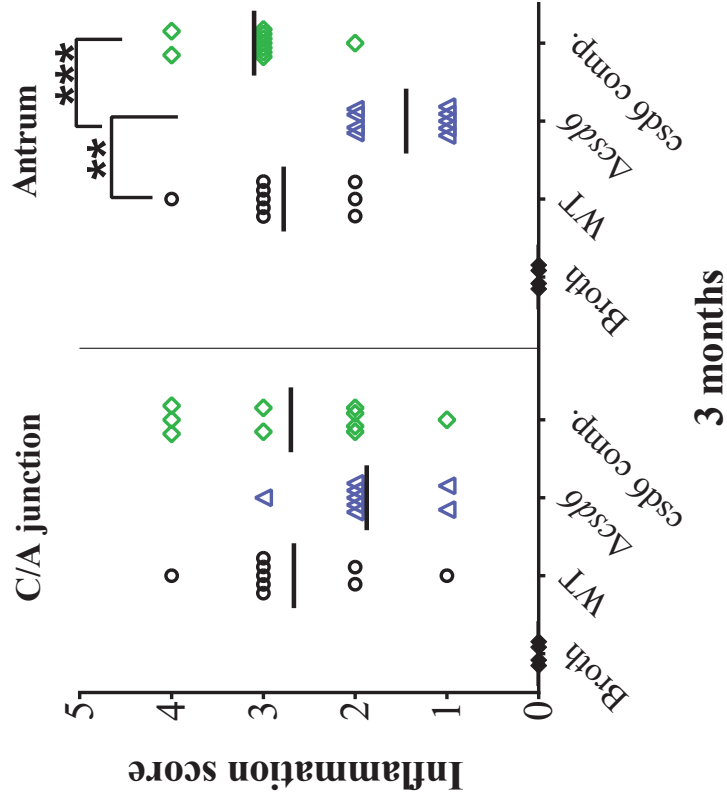**D.**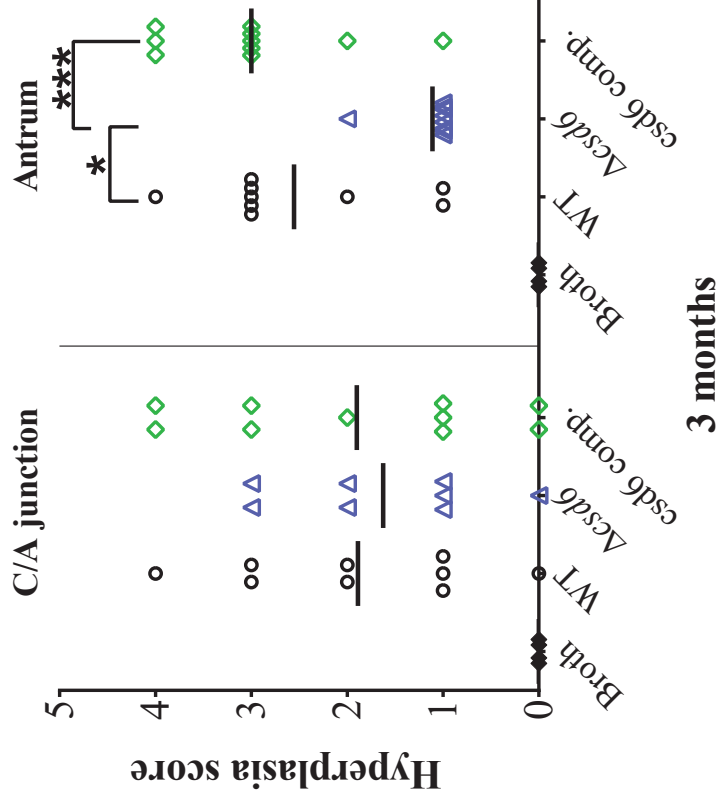

**Figure S4. The  $\Delta csd6$  mutant results in decreased inflammation and hyperplasia scores at one and three months of infection.** Inflammation (A and C) and hyperplasia (B and D) scores in the corpus/antrum (C/A) junction and antrum at one month (A and B) and three months (C and D) of infection (n=9-11 mice per group). Provided are pathological evaluation scores for all gastric tissue sections analyzed and shown in Fig 5. \*  $P < 0.05$ , \*\*  $P < 0.01$ , \*\*\*  $P < 0.001$ , Kruskal-Wallis test with Dunn's multiple test correction.

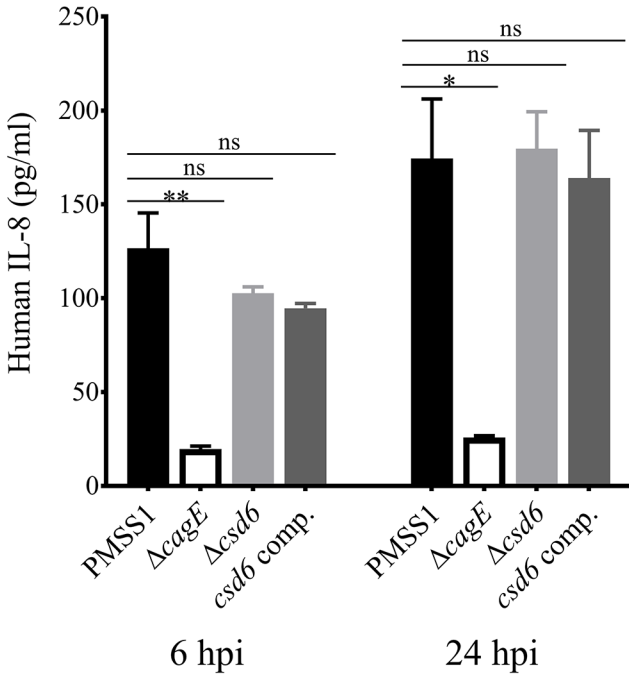

1

2 **Figure S5. The  $\Delta csd6$  mutant and *csd6* complemented strains elicit IL-8 secretion by human**

3 **gastric epithelial cells.** AGS cells (human gastric adenocarcinoma cell line) were infected with

4 the wild-type PMSS1, or the PMSS1 variants  $\Delta cagE$  (which cannot assemble the type IV

5 secretion system),  $\Delta csd6$ , or the *csd6* complemented strain. At the indicated time points, cell

6 culture supernatants were harvested and IL-8 was measured by enzyme-linked immunosorbent

7 assay. The results are shown as the mean +/- standard deviation (SD). Wild-type PMSS1 vs.  $\Delta cagE$ , \*\*p

8 = 0.0097 (6 hpi) and \*p = 0.0147 (24 hpi). For all other comparisons to wild-type PMSS1, no significant

9 differences were observed (ns), unpaired t-test with Welch's correction.

10

11
